# Supplementary material
Source: PubMed Central journal article supplement (PMC4054134)
Supplement: AEM.00130-14_zam999105403so1.pdf [file AEM.00130-14_zam999105403so1.pdf]

**Table S1** Oligonucleotide primers used in this study (primer pairs indicated in materials and methods)

| Primer        | Sequence                                                        | Size bp |
|---------------|-----------------------------------------------------------------|---------|
| melR1fHd3     | TGCGGAAAGCTTATTCTTTACACGGTTACC                                  | 380     |
| melR1rxba1    | CTATGCTCTAGACGATGACCTGTTTGGCCGA                                 |         |
| melR2fHd3     | TGCGGAAAGCTTACTTGCTATCATAACCGAC                                 | 402     |
| melR2rxba1    | CTATGCTCTAGACCTGTACTGCGATGATGT                                  |         |
| rafRfHd3      | GCTAAAGCTTGCAGACCCGATT                                          | 530     |
| rafRrxba1     | GTCATCTAGAGCACATGCCCCACTAGGC                                    |         |
| melR1-confirm | GCTCGCGAACGGCTGGC                                               | 2600    |
| Tetwsal1F     | TCAGCTGTCGACATGCTCATGTACGGTAAG                                  |         |
| melR2-confirm | TCACTGGCTGGCTGGTTC                                              | 2600    |
| Tetwsal1F     | TCAGCTGTCGACATGCTCATGTACGGTAAG                                  |         |
| rafR-confirm  | GCATAGATCTTCTGACGCCAATGCGATTCC                                  | 2600    |
| Tetwsal1F     | TCAGCTGTCGACATGCTCATGTACGGTAAG                                  |         |
| Tetwsal1R     | GCGACGGTCGACCATTACCTTCTGAAACATA                                 |         |
| melR1EcorVF   | GACAAGGATATCATGCATCACCATCACCATCACCATCACCATCACAAACGCGCGACCATCAAC | 1001    |
| melR1Xba1     | GACAAGTCTAGACTATTCCTCGCTCTGGCCC                                 |         |
| melR2Nco1F    | TGCACGCCATGGGCCATCACCATCACCATCACCATCACCATCACAGCGAACCAACAATCTATG | 1002    |
| melR2Xba1R    | CTATGCTCTAGATTAATCTCGAGGTGCTGG                                  |         |
| rokFfbglII    | GCATAGATCTTCTGACGCCAATGCGATTCC                                  |         |
| rokRrpst1     | CGTACTGCAGCCTACCCAATATGCTTCAC                                   | 1206    |
| rafAPEFDNA    | CTGAAGTGCATGGCGGCG                                              |         |
| rafAPERDNA    | GCATCATAACGCAGCGAGCAAG                                          | 378     |
| rafBPEFDNA    | CATTGGCGTCAGACATACTTAAG                                         |         |
| rafBPERDNA    | GAGAACCCGCCGACCACG                                              | 735     |
| melAPEFDNA    | AGCCTTCGAAACGTCATCC                                             |         |
| melAPERDNA    | GGTGATGTTTCGGGTACT                                              | 514     |
| 1862PEFDNA    | GATTGTTGGTTCGCTCATGGG                                           |         |
| 1862PERDNA    | CTTTGATGGTGATGTTTG                                              | 471     |

**Table S2** IRD800 primers used to generate PCR products and primer extension products in this study (primer pairs indicated in materials and methods)

| Name            | Primer                  | Product size<br>(bp) |
|-----------------|-------------------------|----------------------|
| melAIRD800f     | AGCCTTCGAAAACGTCATCC    |                      |
| melAIRD800r     | CAGACATCAGACCGCAATAAC   | 322                  |
| melAIRD800SET1F | TCGCGAGAAGGAAGTGC       |                      |
| melAIRD800SET1R | GTTGGCTTTGTTGCTGGA      | 312                  |
| melAIRD800SET2F | TCGGCCATTTGTTGCG        |                      |
| melAIRD800SET2R | GCCAGCGCCGTCCCACA       | 302                  |
| melAIRD800SET3F | TAAGCCGAGATAGCCAAG      |                      |
| melAIRD800SET3R | GGTGATGTTCCGGTACT       | 302                  |
| 1862IRD800irdf  | GATTGTTGGTTCGCTCATGGG   |                      |
| 1862IRD800irdr  | GAGCCAGGACCACATGCAGT    | 310                  |
| 1862IRD800SET1F | GAAGTTAAAGTCGCCATTG     |                      |
| 1862IRD800SET1R | CTAAATCAGTGCTGACATC     | 300                  |
| 1862IRD800SET2F | CGTAATCGATATCGCAAATG    |                      |
| 1862IRD800SET2R | GCGCCTCATCTACAGTCTTC    | 299                  |
| 1862IRD800SET3F | GATGAGGGTATAAGGAGGTATC  |                      |
| 1862IRD800SET3R | CTTTGATGGTGATGTTTG      | 268                  |
| rafBIRD800irdf  | CATTGGCGTCAGACATACTTAAG |                      |
| rafBIRD800irdr  | GTCTAGGCGTTGAATGTG      | 222                  |
| rafBIRD800SET1F | AAGTGGGCTCGCTGGCG       |                      |
| rafBIRD800SET1R | CACGCCACAGCAGCAGT       | 178                  |
| rafBIRD800SET2F | GCTGAAGCCGGAAGGAA       |                      |
| rafBIRD800SET2R | AGCGTAACGGTACCTGC       | 172                  |
| rafAIRD800f     | GACTCTCCTCAGCACGTTCTTC  |                      |
| rafAIRD800r     | GCCCTTAAGATCGCCGA       | 223                  |
| rafAPERP1       | CTCACCGCCATCTATCTTG     |                      |
| rafAPERP2       | CGACGTATACGGAATGCATTG   |                      |
| rafBPERP1       | CACGCCACAGCAGCAGT       |                      |
| rafBPERP2       | AGCGTAACGGTACCTGC       |                      |
| melAPERP1       | GTTGGCTTTGTTGCTGGA      |                      |
| melAPERP1       | GCCAGCGCCGTCCCACA       |                      |
| 1862PERP1       | CTAAATCAGTGCTGACATC     |                      |
| 1862PERP1       | GCGCCTCATCTACAGTCTTC    |                      |

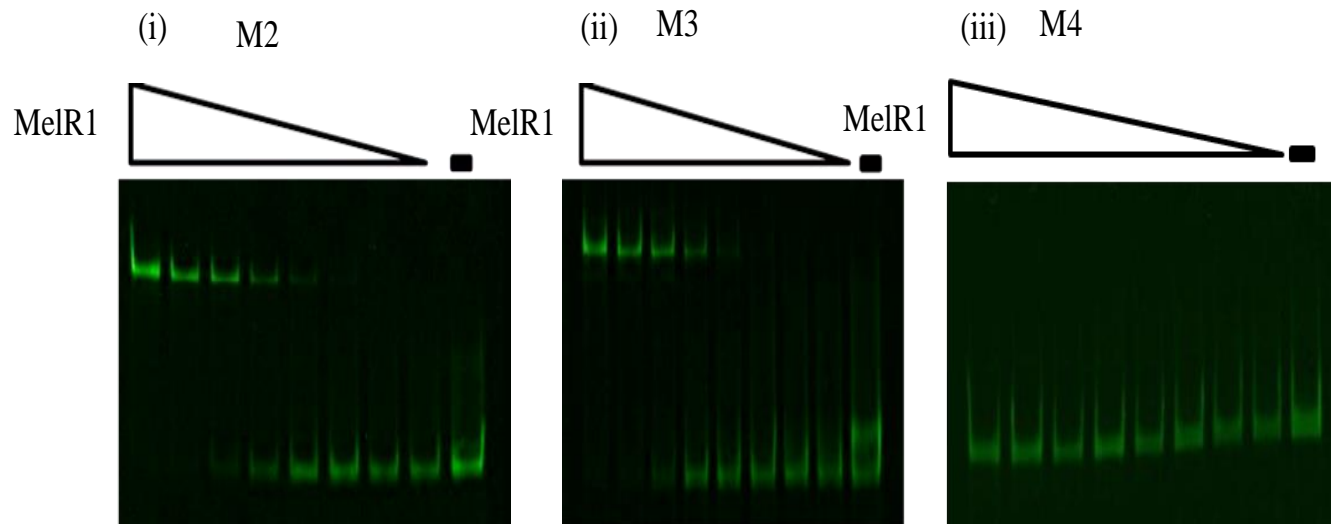

**Figure S1** EMSAs showing MelR1 interaction with DNA fragments encompassing fragments (i) M2 (ii) M3 (iii) M4.

**Table S3** IRD800 labelled annealed primers used to generate wild type sequence (wt) and also a series of mutated sequences (m) in relation to *melA* binding sequence

|                                                   |
|---------------------------------------------------|
| Wt CTCATGCATAAGCGCTTAGCAAATACGCTAAGCCGAGATAGCCAAG |
| M1 CTCATGCATAAGCTATTAGCAAATACGCTAAGCCGAGATAGCCAAG |
| M2 CTCATGCATAAGCGCTTAGCAAATACGAGAAGCCGAGATAGCCAAG |
| M3 CTCATTAATAAGCGCTTAGCAAATACGCTAAGCCGAGATAGCCAAG |
| M4 CTCATGCATAAGCGCTTAGCAAATAATCTAAGCCGAGATAGCCAAG |

Red lettering indicates the mutated base as compared to the WT sequence. All primers were annealed to reverse complementary sequence, forward primers indicated in table. (For details see materials and methods)

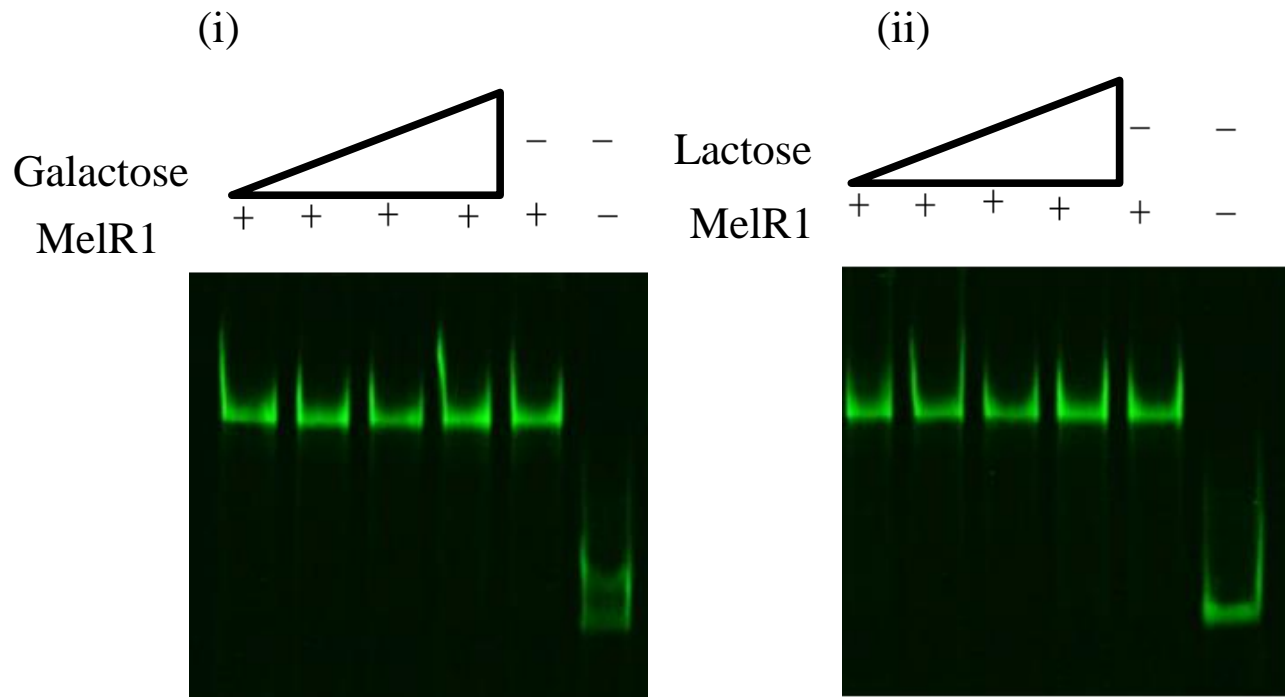

**Figure S2** EMSAs showing MeIR1 interaction with the DNA fragment M1 with the addition of (i) galactose and (ii) lactose at concentrations ranging from 2.5-20 mM.+ carbohydrate plus protein, + - protein no carbohydrate, -- no protein no sugar.

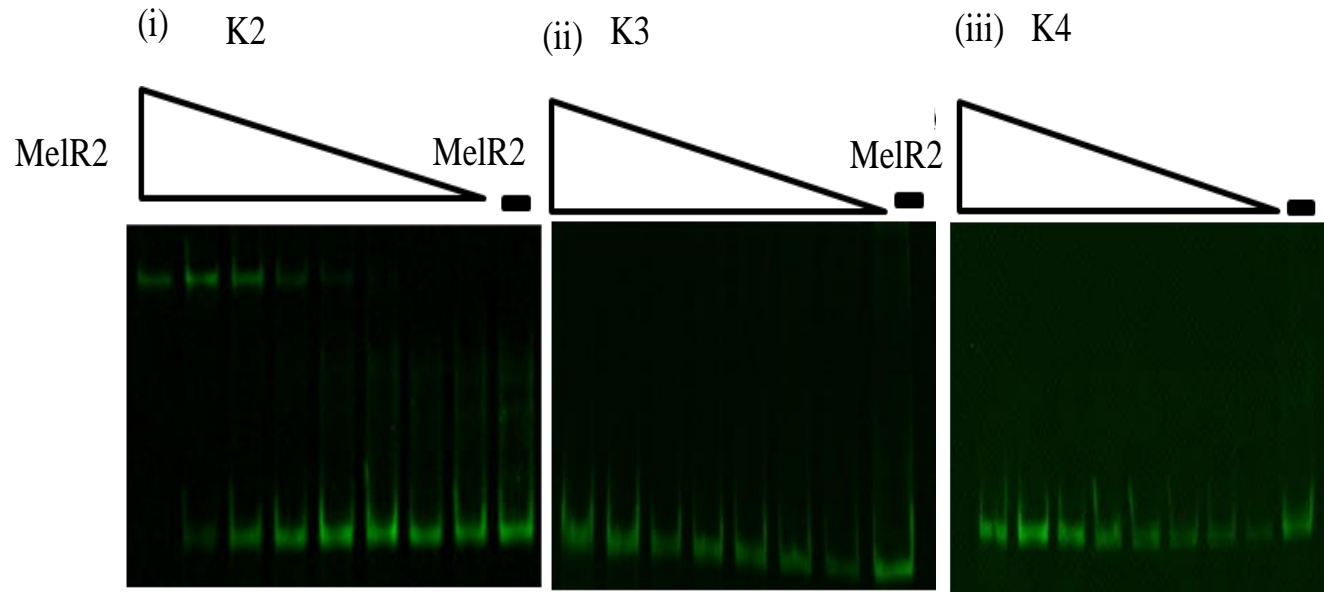

**Figure S3** EMSAs showing MelR2 interaction with DNA fragments encompassing fragments (i) K2 (ii) K3 and (iii) K4.

**Table S4** IRD800 labelled annealed primers used to generate wild type sequence (wt) and also a series of mutated sequences (m) in relation to *Bbr\_1862* binding sequence.

|    |                                                     |
|----|-----------------------------------------------------|
| Wt | TGACGGGTTCGCAAAAAGATGTACGATGTGCGTAATCGATATCGCAAATG  |
| M1 | TGACGGGTTCGCAAAAAGATGTACGCGGTGCGTAATCGATATCGCAAATG  |
| M2 | TGACGGGTTCCTAAAAAAGATGTACGATGTGCGTAATCGATATCGCAAATG |
| M3 | TGACGGGTTCGCAAAAAGATGTACGATGTGCGTACGCGATATCGCAAATG  |

Red lettering indicates the mutated base as compared to the WT sequence. All primers were annealed to reverse complementary sequence, forward primers indicated in table. (For details see materials and methods)

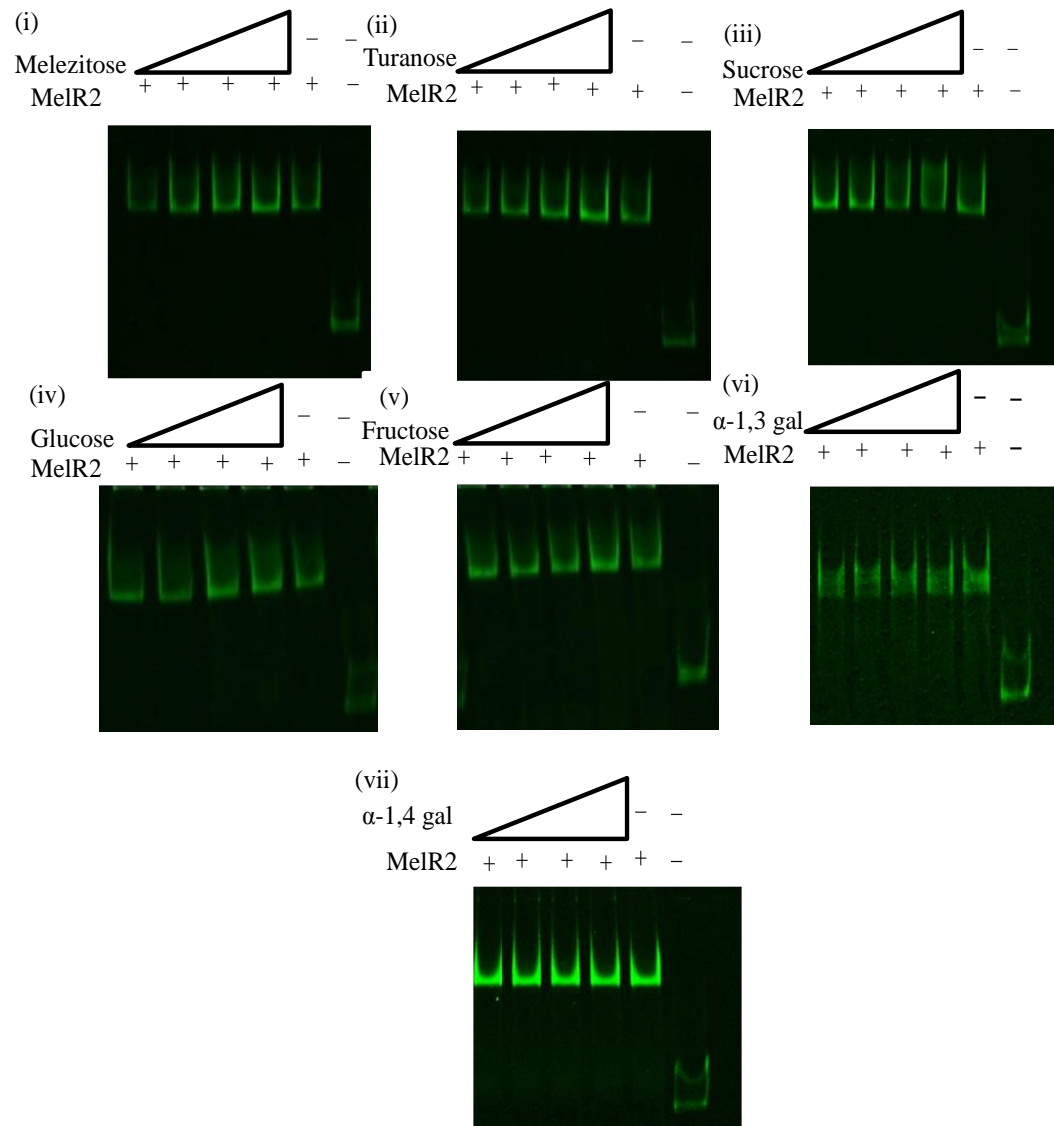

**Figure S4** EMSAs showing MelR2 interaction with the DNA fragment K1 with the addition of (i) Melezitose (ii) Turanose (iii) Sucrose (iv) Glucose (v) fructose (vi)  $\alpha$ -1,3 galactobiose (vii)  $\alpha$ -1,4 galactobiose at concentrations ranging from 2.5-20 mM. + carbohydrate plus protein, + - protein no carbohydrate, -- no protein no sugar.



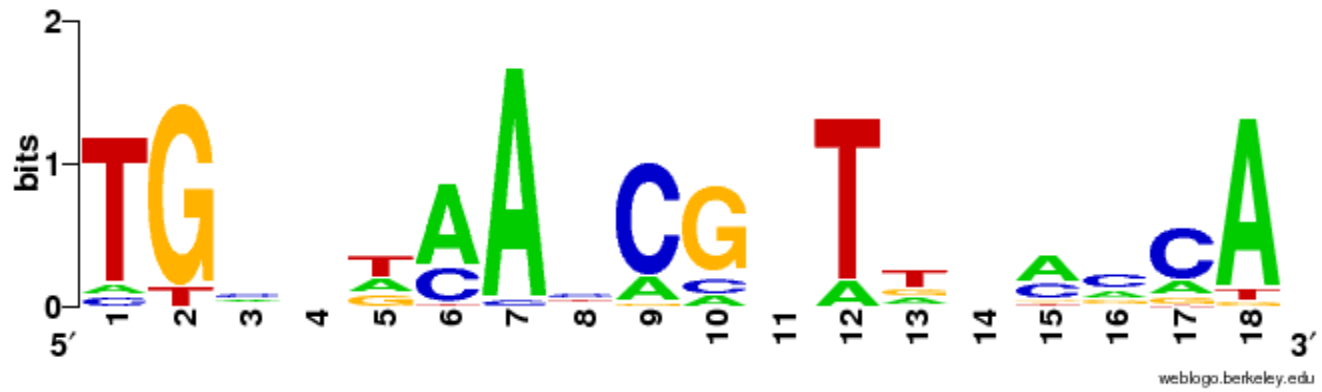

**Figure S5** Weblogo of published LacI motifs present in *B. breve* UCC2003

Table S5. LacI motifs on genome of *B. breve* UCC2003

| <b>Locus tag</b> | <b>Gene</b> | <b>LacI binding site</b> | <b>E value</b> | <b>Closest LacI gene</b> | <b>gene distance</b> |
|------------------|-------------|--------------------------|----------------|--------------------------|----------------------|
| Bbr_0013         | Bbr_0013    | TGCGAAACCGCATGCACA       | 8.6            | Bbr_0008                 | 5                    |
| Bbr_0020         | Bbr_0020    | TGCTTAATCGCTTAAATG       | 68             | Bbr_0019                 | 1                    |
| Bbr_0021         | Bbr_0021    | TGATTCATCCGTACACCA       | 24             | Bbr_0019                 | 2                    |
| Bbr_0027         | Bbr_0027    | TGTGACAACGTTTGACCA       | 4.1            | Bbr_0023                 | 4                    |
| Bbr_0092         | htpX        | CGGTAAAGCGGTAAAACA       | 69             | Bbr_0099                 | 7                    |
| Bbr_0097         | crcb1       | TGCGGAATCGGACATCCA       | 1.40E+02       | Bbr_0099                 | 2                    |
| Bbr_0101         | scrT        | CGACTAACCGTTGGCCCA       | 44             | Bbr_0102                 | 1                    |
| Bbr_0106         | cldE        | TTTGGAACGGTTCCAAA        | 92             | Bbr_0105                 | 1                    |
| Bbr_0111         | agl3        | TGCTGAACCCAATAACCA       | 21             | Bbr_0112                 | 1                    |
| Bbr_0113         | Bbr_0113    | TGCAAACCGATTTGCT         | 19             | Bbr_0112                 | 1                    |
| Bbr_0114         | Bbr_0114    | TGAATAACCAATATTCAA       | 54             | Bbr_0112                 | 2                    |
| Bbr_0116         | malQ1       | AGCAGAACAGGTTCAACA       | 72             | Bbr_0112                 | 4                    |
| Bbr_0122         | Bbr_0122    | TGCAGCACAGTTGACAGA       | 1.80E+02       | Bbr_0122                 | 0                    |
| Bbr_0285         | lacZ2       | TTCTGAAACGTTACAGAA       | 43             | Bbr_0283                 | 2                    |
| Bbr_0417         | Bbr_0417    | TGGTACACGGGTGTACCA       | 30             | Bbr_0421                 | 4                    |
| Bbr_0422         | galA        | TGATACACCGGTTGACCA       | 2.3            | Bbr_0421                 | 1                    |
| Bbr_0422         | galA        | TGATACACAGCTGTACCA       | 5.4            | Bbr_0421                 | 1                    |
| Bbr_0927         | ilvE        | TGAATCATAATTGCAACA       | 1.50E+02       | Bbr_0934                 | 7                    |
| Bbr_1419         | rhsA1       | TGATTAAACGTTAAATCA       | 1.9            | Bbr_1420                 | 1                    |
| Bbr_1427         | trpF        | TG-CATCACGATTTGCA        | 1.50E+02       | Bbr_1432                 | 5                    |
| Bbr_1658         | Bbr_1658    | TGTCGAATCGGTTGCGGA       | 1.40E+02       | Bbr_1659                 | 1                    |
| Bbr_1742         | Bbr_1742    | TGGGTCATCCGTTTACCA       | 33             | Bbr_1745                 | 3                    |
| Bbr_1744         | Bbr_1744    | TGAATAAAAATTTTCGCA       | 67             | Bbr_1745                 | 1                    |
| Bbr_1827         | Bbr_1827    | TTAATAACCCAATAACCA       | 1.70E+02       | Bbr_1831                 | 4                    |
| Bbr_1842         | aap6        | AGCATAATCGCTGACGGA       | 1.90E+02       | Bbr_1846                 | 4                    |
| Bbr_1845         | Bbr_1845    | TGTAGAAACGCTGTAAAT       | 35             | Bbr_1846                 | 1                    |
| Bbr_1860         | Bbr_1860    | TGCATAAGCGCTTAGCAA       | 3.1            | Bbr_1863                 | 3                    |
| Bbr_1862         | Bbr_1862    | TGCGTAATCGATATCGCA       | 2.8            | Bbr_1863                 | 1                    |

**Table S6** IRD700 labelled primers used to generate annealed wild type sequence (wt) in combination with reverse complementary primer, only forward primer indicated, and also a series of mutated sequences (m) by PCR used in combination with RV in relation to RafR binding sequence (For details see materials and methods)

|     |                                      |
|-----|--------------------------------------|
| RV  | GCGATGCGTATGCTCGGATC                 |
| WT  | GCGCGGTATTTGTGATTAACGCAATAAATAATGC   |
| M1  | TCGCGGTATTTGTGATTAACGCAATAAATAATGC   |
| M2  | GAGCGGTATTTGTGATTAACGCAATAAATAATGC   |
| M3  | GCTCGGTATTTGTGATTAACGCAATAAATAATGC   |
| M4  | GCGAGGTATTTGTGATTAACGCAATAAATAATGC   |
| M5  | GCGCTGTATTTGTGATTAACGCAATAAATAATGC   |
| M6  | GCGCGTTATTTGTGATTAACGCAATAAATAATGC   |
| M7  | GCGCGGTATTTGTGATTAACGCAATAAATAATGC   |
| M8  | GCGCGGTCTTTGTGATTAACGCAATAAATAATGC   |
| M9  | GCGCGGTAGTTTGTGATTAACGCAATAAATAATGC  |
| M10 | GCGCGGTATGTTGTGATTAACGCAATAAATAATGC  |
| M11 | GCGCGGTATTGTTGTGATTAACGCAATAAATAATGC |
| M12 | GCGCGGTATTTGGTGATTAACGCAATAAATAATGC  |
| M13 | GCGCGGTATTTTGTGATTAACGCAATAAATAATGC  |
| M14 | GCGCGGTATTTGGGATTAACGCAATAAATAATGC   |
| M15 | GCGCGGTATTTGTATTAAACGCAATAAATAATGC   |
| M16 | GCGCGGTATTTGTGCTTAACGCAATAAATAATGC   |
| M17 | GCGCGGTATTTGTGAGTAACGCAATAAATAATGC   |
| M18 | GCGCGGTATTTGTGATGAACGCAATAAATAATGC   |
| M19 | GCGCGGTATTTGTGATTCACGCAATAAATAATGC   |
| M20 | GCGCGGTATTTGTGATTAACCGCAATAAATAATGC  |
| M21 | GCGCGGTATTTGTGATTAAGCAATAAATAATGC    |
| M22 | GCGCGGTATTTGTGATTAACCTCAATAAATAATGC  |
| M23 | GCGCGGTATTTGTGATTAACGAAATAAATAATGC   |
| M24 | GCGCGGTATTTGTGATTAACGCCATAAATAATGC   |
| M25 | GCGCGGTATTTGTGATTAACGCACTAAATAATGC   |
| M26 | GCGCGGTATTTGTGATTAACGCAAGAAATAATGC   |
| M27 | GCGCGGTATTTGTGATTAACGCAATCAATAATGC   |
| M28 | GCGCGGTATTTGTGATTAACGCAATACATAATGC   |
| M29 | GCGCGGTATTTGTGATTAACGCAATAACTAATGC   |
| M30 | GCGCGGTATTTGTGATTAACGCAATAAAGAATGC   |
| M31 | GCGCGGTATTTGTGATTAACGCAATAAATCATGC   |
| M32 | GCGCGGTATTTGTGATTAACGCAATAAATACTGC   |
| M33 | GCGCGGTATTTGTGATTAACGCAATAAATAAGGC   |
| M34 | GCGCGGTATTTGTGATTAACGCAATAAATAATTC   |
| M35 | GCGCGGTATTTGTGATTAACGCAATAAATAATGA   |

Red lettering indicates the mutated base as compared to the WT sequence.

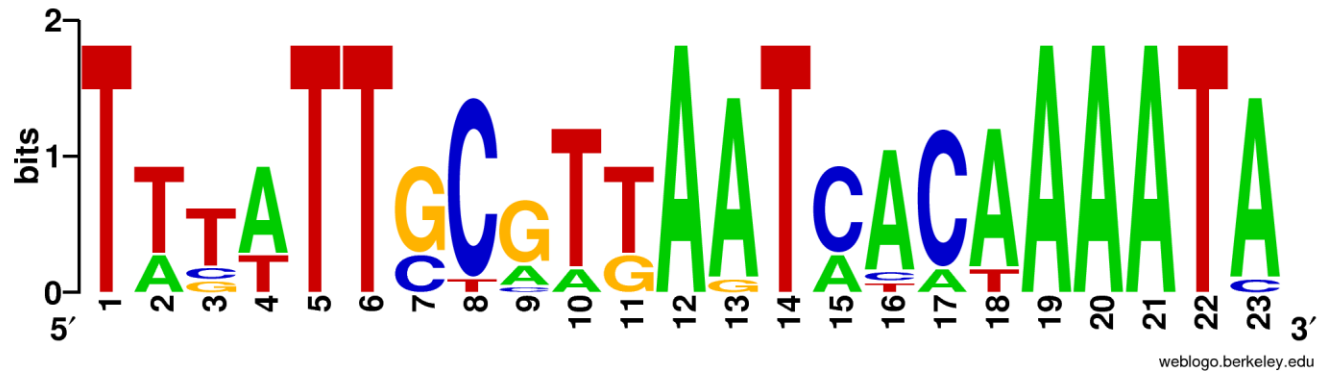

**Figure S6** Analysis of sequenced bifidobacterial genomes, which all contain a homologue of the *B. breve* *raf* locus, reveals the presence of a single conserved RafR operator site in the *rafB* promoter region, whereas no other sites could be detected. Bases important for binding (as determined above) are conserved between bifidobacterial species

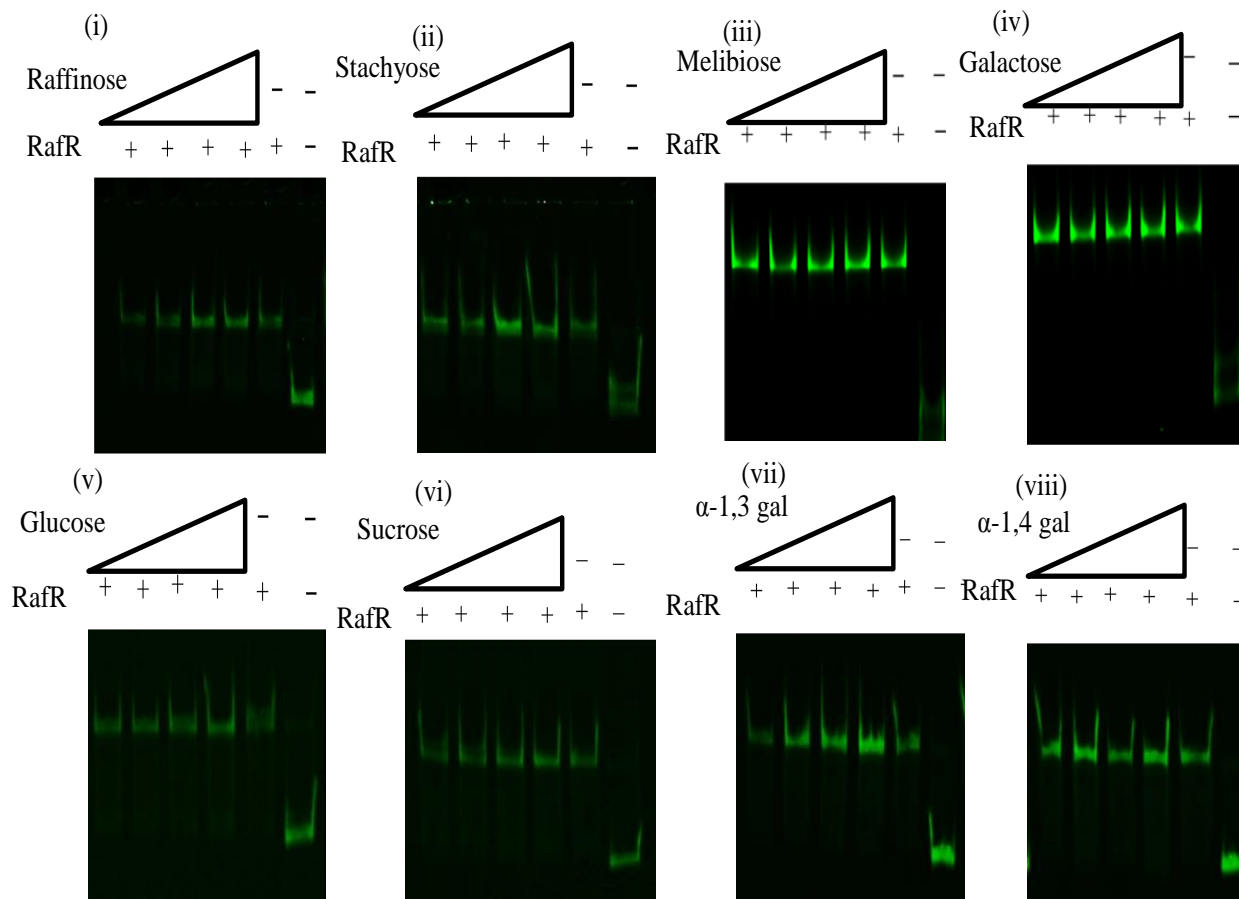

**Figure S7** EMSAs showing RafR interaction with the DNA fragment R1 with the addition of (i) raffinose (ii) stachyose (iii) melibiose (iv) galactose (v) glucose (vi) sucrose (vii)  $\alpha$ -1,3 galactobiose (viii)  $\alpha$ -1,4 galactobiose at concentrations ranging from 2.5-20 mM. + carbohydrate plus protein, + - protein no carbohydrate, -- no protein no sugar.

**Table S7** Summary of EMSAs showing MelR1, MelR2 and RafR interactions.

| <b>Protein</b> | <b>Promoter region</b> | <b>Binding Sequence</b>         | <b>Fragments bound</b> | <b>Inducing Carbohydrate</b> |
|----------------|------------------------|---------------------------------|------------------------|------------------------------|
| MelR1          | <i>melA</i>            | 5'-TGCATAAGC><GCTTAGCAA-3'      | M1, M2, M3             | Melezitose                   |
| MelR2          | <i>Bbr_1862</i>        | 5'-TGCGTAATC><GATATCGCA-3'      | K1, K2                 | Unknown                      |
| RafR           | <i>rafB</i>            | 5'-TTTATTGCGTT>A<ATCACAAAATA-3' | R1                     | Unknown                      |
